# Supplementary material
Source: HighWire-hosted journal article supplement (https://openres.ersjournals.com/content/7/1/00254-2020)
Supplement: inline-supplementary-material-4 [file inline-supplementary-material-4.pdf]

| gene                | value_1 (NHBEF FPKM) | value_2 (B-HBEC FPKM) | log2(fold_change) | p_value  | q_value  |
|---------------------|----------------------|-----------------------|-------------------|----------|----------|
| COX7A1              | 0.274766             | 0                     | .-inf             | 5.00E-05 | 0.005578 |
| GUSBP2              | 0.113764             | 5.89283               | 5.69484           | 5.00E-05 | 0.005578 |
| HAS2                | 0.0236277            | 0.988465              | 5.38664           | 5.00E-05 | 0.005578 |
| THY1                | 0.569995             | 9.19773               | 4.01226           | 5.00E-05 | 0.005578 |
| DENND2A             | 0.0401943            | 0.606154              | 3.91462           | 5.00E-05 | 0.005578 |
| DMBT1               | 0.0334296            | 0.394785              | 3.56187           | 0.00015  | 0.013326 |
| TOX2                | 0.216937             | 2.52481               | 3.54082           | 5.00E-05 | 0.005578 |
| CSF3                | 1.73168              | 17.5351               | 3.34              | 5.00E-05 | 0.005578 |
| CPNE7               | 0.840086             | 7.73145               | 3.20213           | 5.00E-05 | 0.005578 |
| ATP1A3              | 0.033532             | 0.300184              | 3.16224           | 5.00E-05 | 0.005578 |
| BCL2A1              | 0.568538             | 4.27885               | 2.9119            | 5.00E-05 | 0.005578 |
| RP6-91H8.3          | 0.0692846            | 0.509327              | 2.87799           | 0.0003   | 0.023121 |
| KIAA1644            | 0.302398             | 2.12941               | 2.81593           | 5.00E-05 | 0.005578 |
| DPF3                | 0.0523882            | 0.351433              | 2.74593           | 5.00E-05 | 0.005578 |
| PMP22               | 0.058532             | 0.384072              | 2.71408           | 5.00E-05 | 0.005578 |
| ANPEP               | 5.71394              | 36.9927               | 2.69469           | 5.00E-05 | 0.005578 |
| TSPAN18             | 0.0437121            | 0.275059              | 2.65364           | 5.00E-05 | 0.005578 |
| PLAT                | 1.65235              | 10.2861               | 2.6381            | 5.00E-05 | 0.005578 |
| BM11,COMMMD3,COMM   | 43.6574              | 270.143               | 2.62943           | 5.00E-05 | 0.005578 |
| KCNJ12              | 0.228171             | 1.3552                | 2.57032           | 0.00045  | 0.032102 |
| LGR6                | 0.0900057            | 0.524112              | 2.54179           | 5.00E-05 | 0.005578 |
| KIF26A              | 0.112083             | 0.619931              | 2.46755           | 5.00E-05 | 0.005578 |
| ZFP57               | 0.105466             | 0.574102              | 2.44453           | 0.0007   | 0.044043 |
| ZYG11A              | 0.0733509            | 0.398404              | 2.44135           | 5.00E-05 | 0.005578 |
| ADAMTS15            | 0.509336             | 2.60069               | 2.35221           | 5.00E-05 | 0.005578 |
| MEG9,MIR369,MIR377, | 0.205368             | 1.02095               | 2.31362           | 0.00045  | 0.032102 |
| ANO1                | 2.97209              | 14.5044               | 2.28694           | 5.00E-05 | 0.005578 |
| COL22A1             | 3.23769              | 15.2584               | 2.23656           | 5.00E-05 | 0.005578 |
| MYCBPAP             | 0.346841             | 1.62836               | 2.23107           | 5.00E-05 | 0.005578 |
| ADAM12              | 0.14163              | 0.654749              | 2.20882           | 5.00E-05 | 0.005578 |
| RTN4RL1             | 0.922949             | 4.03704               | 2.12897           | 5.00E-05 | 0.005578 |
| SH2D2A              | 3.14786              | 13.5819               | 2.10924           | 0.0001   | 0.009692 |
| RP11-336A10.4       | 3.56013              | 15.3113               | 2.10459           | 5.00E-05 | 0.005578 |
| VNN1                | 0.35341              | 1.51865               | 2.10337           | 5.00E-05 | 0.005578 |
| IGF2,INS,INS-IGF2   | 4.24958              | 18.2047               | 2.09892           | 5.00E-05 | 0.005578 |
| H19                 | 25.5095              | 107.148               | 2.0705            | 5.00E-05 | 0.005578 |
| B4GALNT1            | 0.256898             | 1.06227               | 2.04788           | 0.00015  | 0.013326 |
| FAP                 | 1.49925              | 6.14605               | 2.03542           | 5.00E-05 | 0.005578 |
| KLHL4               | 0.406132             | 1.65877               | 2.03009           | 0.00025  | 0.020415 |
| FOXC2               | 0.387427             | 1.53793               | 1.989             | 0.00015  | 0.013326 |
| SH3RF3              | 0.599272             | 2.36702               | 1.98179           | 0.0003   | 0.023121 |
| P2RY6               | 0.152664             | 0.60172               | 1.97874           | 5.00E-05 | 0.005578 |
| L1TD1               | 0.593702             | 2.30385               | 1.95624           | 5.00E-05 | 0.005578 |
| C15orf52            | 5.67426              | 21.9224               | 1.9499            | 5.00E-05 | 0.005578 |
| SLC46A3             | 0.841654             | 3.24734               | 1.94796           | 5.00E-05 | 0.005578 |
| ZNF469              | 0.0838173            | 0.320788              | 1.9363            | 5.00E-05 | 0.005578 |
| GDPD5               | 0.884717             | 3.26402               | 1.88336           | 5.00E-05 | 0.005578 |
| CYP27C1             | 0.585058             | 2.13868               | 1.87007           | 0.00035  | 0.026134 |
| GOLGA7B             | 0.748671             | 2.70899               | 1.85535           | 5.00E-05 | 0.005578 |
| SEMA7A              | 8.24916              | 29.1234               | 1.81986           | 5.00E-05 | 0.005578 |
| TGM2                | 10.3797              | 36.3905               | 1.8098            | 5.00E-05 | 0.005578 |
| APLN                | 0.583756             | 2.03947               | 1.80476           | 0.0006   | 0.039703 |
| DOCK2               | 0.082299             | 0.286008              | 1.79711           | 0.00025  | 0.020415 |
| MGAT5B              | 0.177727             | 0.617471              | 1.79671           | 0.0001   | 0.009692 |
| SLC35F3             | 1.16363              | 3.97299               | 1.77159           | 5.00E-05 | 0.005578 |
| LCK                 | 0.13144              | 0.446925              | 1.76562           | 0.0001   | 0.009692 |
| HEPH1               | 2.5763               | 8.73974               | 1.76229           | 5.00E-05 | 0.005578 |
| C9orf47,S1PR3       | 1.12236              | 3.76996               | 1.74801           | 5.00E-05 | 0.005578 |

|                  |          |          |         |          |          |
|------------------|----------|----------|---------|----------|----------|
| STMN3            | 0.513396 | 1.69538  | 1.72346 | 0.0002   | 0.016833 |
| INPP5J           | 0.211489 | 0.691197 | 1.70852 | 0.0001   | 0.009692 |
| STC1             | 0.650872 | 2.07701  | 1.67406 | 0.0002   | 0.016833 |
| NEFH             | 0.31338  | 0.997584 | 1.67052 | 0.0003   | 0.023121 |
| NRGN             | 1.38424  | 4.36724  | 1.65762 | 0.00055  | 0.037295 |
| TNS1             | 1.5929   | 4.95098  | 1.63606 | 5.00E-05 | 0.005578 |
| APBB1            | 0.808134 | 2.48916  | 1.623   | 5.00E-05 | 0.005578 |
| MT1L             | 26.6701  | 81.977   | 1.61999 | 5.00E-05 | 0.005578 |
| MFI2             | 7.03735  | 20.9312  | 1.57255 | 5.00E-05 | 0.005578 |
| GPR68            | 4.7522   | 14.0932  | 1.56833 | 5.00E-05 | 0.005578 |
| COL4A1           | 15.0093  | 43.8907  | 1.54806 | 0.0001   | 0.009692 |
| TP53I11          | 5.68144  | 16.384   | 1.52796 | 5.00E-05 | 0.005578 |
| ADAMTS6          | 0.825711 | 2.30023  | 1.47807 | 5.00E-05 | 0.005578 |
| NRIP3            | 0.596546 | 1.65884  | 1.47547 | 0.0001   | 0.009692 |
| GAL              | 2.98007  | 8.26974  | 1.4725  | 0.0008   | 0.049205 |
| ARHGDI8          | 14.2664  | 39.4932  | 1.46898 | 5.00E-05 | 0.005578 |
| IL7R             | 0.316957 | 0.870745 | 1.45796 | 0.0006   | 0.039703 |
| UHRF1            | 2.3734   | 6.47393  | 1.44769 | 5.00E-05 | 0.005578 |
| PAK3             | 0.468847 | 1.25294  | 1.41812 | 0.00025  | 0.020415 |
| SLC29A1          | 7.16163  | 19.1128  | 1.41618 | 5.00E-05 | 0.005578 |
| LBH              | 5.10381  | 13.521   | 1.40555 | 0.00055  | 0.037295 |
| KANK4            | 1.85918  | 4.9105   | 1.4012  | 5.00E-05 | 0.005578 |
| HAPLN3           | 1.64353  | 4.31969  | 1.39413 | 0.00065  | 0.041717 |
| SCAPER           | 3.50507  | 9.12863  | 1.38096 | 5.00E-05 | 0.005578 |
| SFRP1            | 12.0989  | 31.4344  | 1.37747 | 5.00E-05 | 0.005578 |
| KCNN4            | 5.95563  | 15.4041  | 1.37099 | 0.0001   | 0.009692 |
| PGBD5            | 1.48398  | 3.80897  | 1.35993 | 0.0001   | 0.009692 |
| PDE4B            | 0.121462 | 0.310263 | 1.35299 | 0.00045  | 0.032102 |
| TNNT1            | 13.3329  | 33.8706  | 1.34505 | 5.00E-05 | 0.005578 |
| RP11-424C20.2    | 3.8109   | 9.65226  | 1.34074 | 5.00E-05 | 0.005578 |
| NACAD            | 0.713821 | 1.80707  | 1.34002 | 5.00E-05 | 0.005578 |
| SERPINE1         | 261.722  | 659.102  | 1.33246 | 5.00E-05 | 0.005578 |
| CPNE2            | 5.16571  | 13.0058  | 1.33212 | 5.00E-05 | 0.005578 |
| MVB12B           | 0.731912 | 1.78046  | 1.28251 | 0.0002   | 0.016833 |
| ELFN2            | 1.95064  | 4.72632  | 1.27677 | 5.00E-05 | 0.005578 |
| PLOD2            | 62.1789  | 150.154  | 1.27194 | 5.00E-05 | 0.005578 |
| CNTNAP2          | 2.51227  | 6.02438  | 1.26182 | 5.00E-05 | 0.005578 |
| CORO1A           | 4.76412  | 11.3398  | 1.25112 | 0.0003   | 0.023121 |
| ELAVL2           | 1.42117  | 3.34304  | 1.23408 | 0.0005   | 0.034639 |
| ITGB6            | 32.3211  | 75.0265  | 1.21493 | 5.00E-05 | 0.005578 |
| LPXN             | 13.2452  | 30.6802  | 1.21184 | 5.00E-05 | 0.005578 |
| PGM2L1           | 1.15866  | 2.6672   | 1.20288 | 5.00E-05 | 0.005578 |
| MCM6             | 3.71762  | 8.5212   | 1.19668 | 5.00E-05 | 0.005578 |
| ARHGAP22         | 4.30971  | 9.87678  | 1.19645 | 5.00E-05 | 0.005578 |
| SPARC            | 72.8725  | 164.27   | 1.17262 | 5.00E-05 | 0.005578 |
| TFPI2            | 41.3027  | 92.9629  | 1.17042 | 5.00E-05 | 0.005578 |
| RP4-555D20.2     | 2.19385  | 4.92348  | 1.16621 | 5.00E-05 | 0.005578 |
| MCM5             | 8.64001  | 19.3763  | 1.16519 | 0.0004   | 0.02941  |
| FLI1             | 5.46216  | 12.1859  | 1.15766 | 0.00045  | 0.032102 |
| HMGCS1           | 62.4791  | 138.292  | 1.14627 | 5.00E-05 | 0.005578 |
| AC096677.1,NAV1  | 5.16886  | 11.381   | 1.13872 | 0.0002   | 0.016833 |
| CDH11            | 12.9351  | 27.9328  | 1.11067 | 0.0005   | 0.034639 |
| SPOCK1           | 35.1549  | 75.089   | 1.09487 | 0.0003   | 0.023121 |
| INHBA            | 12.8564  | 27.2771  | 1.08521 | 0.0002   | 0.016833 |
| WNT5A            | 1.49349  | 3.16347  | 1.08282 | 0.00035  | 0.026134 |
| NTM              | 13.0533  | 27.5339  | 1.0768  | 0.00075  | 0.046578 |
| AKAP12           | 3.35153  | 7.05103  | 1.07302 | 5.00E-05 | 0.005578 |
| SOX9             | 4.49584  | 9.42085  | 1.06727 | 0.0001   | 0.009692 |
| AC010441.1,SMIM3 | 5.51788  | 11.4981  | 1.05921 | 0.00035  | 0.026134 |

|                       |         |         |           |          |          |
|-----------------------|---------|---------|-----------|----------|----------|
| NEDD9                 | 4.76931 | 9.8822  | 1.05105   | 5.00E-05 | 0.005578 |
| IVNS1ABP              | 28.7497 | 59.5159 | 1.04973   | 0.00025  | 0.020415 |
| GRK5                  | 3.61897 | 7.4869  | 1.04879   | 0.00035  | 0.026134 |
| MCM3                  | 9.36816 | 19.3727 | 1.04819   | 0.00015  | 0.013326 |
| SLC2A6                | 4.5932  | 9.48894 | 1.04675   | 0.0008   | 0.049205 |
| SORBS2                | 2.4683  | 5.09129 | 1.04451   | 5.00E-05 | 0.005578 |
| COL4A2                | 74.8604 | 154.035 | 1.04098   | 5.00E-05 | 0.005578 |
| GJC1                  | 2.45669 | 5.03583 | 1.03552   | 0.00075  | 0.046578 |
| LTBP1                 | 8.94325 | 18.1927 | 1.02449   | 5.00E-05 | 0.005578 |
| THBS1                 | 226.274 | 458.275 | 1.01814   | 0.00045  | 0.032102 |
| ZBED2                 | 18.0352 | 36.3565 | 1.0114    | 5.00E-05 | 0.005578 |
| PTHLH                 | 279.824 | 563.733 | 1.01049   | 5.00E-05 | 0.005578 |
| STK38                 | 14.6001 | 29.0689 | 0.993502  | 0.0008   | 0.049205 |
| AFAP1L2               | 8.39347 | 16.6672 | 0.989673  | 0.0007   | 0.044043 |
| SAMHD1                | 1.43449 | 2.82885 | 0.979678  | 0.00065  | 0.041717 |
| PDPN                  | 38.8218 | 75.4421 | 0.958502  | 0.0005   | 0.034639 |
| CCDC8                 | 6.94926 | 13.4778 | 0.955654  | 0.0002   | 0.016833 |
| SIPA1L3               | 5.29109 | 10.2479 | 0.953697  | 0.0004   | 0.02941  |
| ALDH1A3               | 88.572  | 171.513 | 0.953394  | 5.00E-05 | 0.005578 |
| SLC6A11               | 3.78845 | 7.25183 | 0.936737  | 0.0007   | 0.044043 |
| MOB3B                 | 4.35153 | 8.29223 | 0.930236  | 0.0001   | 0.009692 |
| RAC2                  | 68.849  | 129.69  | 0.913556  | 0.0003   | 0.023121 |
| CSRNP1                | 6.10616 | 11.4072 | 0.901603  | 0.0005   | 0.034639 |
| DPYSL2                | 5.12634 | 9.55298 | 0.898021  | 0.00015  | 0.013326 |
| EFNB2                 | 16.0533 | 29.7862 | 0.891777  | 5.00E-05 | 0.005578 |
| CDC42EP2              | 9.75863 | 18.0294 | 0.8856    | 0.0007   | 0.044043 |
| ARL4C                 | 20.5814 | 37.9492 | 0.882728  | 0.0001   | 0.009692 |
| SDC3                  | 8.70639 | 16.0315 | 0.880765  | 5.00E-05 | 0.005578 |
| THBS2                 | 6.34944 | 11.6893 | 0.880494  | 0.00075  | 0.046578 |
| PRG2,RP11-872D17.8,SI | 8.7072  | 15.9366 | 0.872064  | 0.0004   | 0.02941  |
| TGFBI                 | 477.163 | 873.286 | 0.871972  | 0.0001   | 0.009692 |
| LPIN1                 | 9.67595 | 17.6249 | 0.865139  | 5.00E-05 | 0.005578 |
| MARVELD1              | 19.667  | 35.6014 | 0.856152  | 5.00E-05 | 0.005578 |
| EPHB2                 | 23.0615 | 41.1094 | 0.833981  | 5.00E-05 | 0.005578 |
| NET1                  | 84.8866 | 151.268 | 0.833497  | 0.0001   | 0.009692 |
| SMTN                  | 45.5151 | 80.9741 | 0.831115  | 0.00015  | 0.013326 |
| EPN3,SPATA20          | 34.3044 | 60.9186 | 0.828491  | 0.0003   | 0.023121 |
| AMIGO2                | 46.9072 | 82.8529 | 0.820744  | 0.00025  | 0.020415 |
| TNS3                  | 4.08504 | 7.1832  | 0.814277  | 0.0003   | 0.023121 |
| TUBA1B                | 356.266 | 614.336 | 0.786074  | 0.00055  | 0.037295 |
| RP11-121L10.3         | 53.9437 | 92.9208 | 0.784547  | 0.00045  | 0.032102 |
| CAMK2N1               | 18.5484 | 31.7681 | 0.776286  | 0.0006   | 0.039703 |
| IL1B                  | 65.8002 | 111.079 | 0.755423  | 0.0002   | 0.016833 |
| CD276                 | 40.9351 | 69.0981 | 0.755308  | 0.00065  | 0.041717 |
| SYNPO                 | 21.7693 | 35.3139 | 0.69794   | 0.0006   | 0.039703 |
| EGR1                  | 90.1468 | 53.3793 | -0.755994 | 5.00E-05 | 0.005578 |
| S100A8                | 502.034 | 289.475 | -0.794345 | 0.0006   | 0.039703 |
| RAB11FIP1             | 11.4544 | 6.57325 | -0.801222 | 0.00015  | 0.013326 |
| FTL                   | 1969.59 | 1098.78 | -0.841998 | 0.00015  | 0.013326 |
| FTLP3                 | 1009.78 | 561.826 | -0.845848 | 0.0001   | 0.009692 |
| CBX4                  | 37.0305 | 20.3625 | -0.862798 | 0.00065  | 0.041717 |
| GLTP                  | 86.2923 | 47.3182 | -0.866838 | 0.0003   | 0.023121 |
| EPPK1                 | 12.5242 | 6.81375 | -0.878194 | 0.0001   | 0.009692 |
| OTUD1                 | 8.3742  | 4.41921 | -0.922163 | 0.0003   | 0.023121 |
| ABLIM1                | 49.7419 | 25.7092 | -0.952176 | 5.00E-05 | 0.005578 |
| LYPD3                 | 98.7163 | 50.8973 | -0.955699 | 0.00035  | 0.026134 |
| SERPINB7              | 33.5386 | 17.1997 | -0.96344  | 0.0002   | 0.016833 |
| PIM3                  | 35.042  | 17.7879 | -0.978189 | 5.00E-05 | 0.005578 |
| SERPINB1              | 44.6258 | 22.0303 | -1.01839  | 0.0005   | 0.034639 |

|                      |          |          |          |          |          |
|----------------------|----------|----------|----------|----------|----------|
| RAPGEFL1             | 25.7927  | 12.6652  | -1.02609 | 0.00015  | 0.013326 |
| AQP3                 | 117.609  | 57.1564  | -1.04101 | 0.0003   | 0.023121 |
| ZFP36                | 112.574  | 54.2161  | -1.05408 | 5.00E-05 | 0.005578 |
| CSTA                 | 444.976  | 214.002  | -1.05611 | 5.00E-05 | 0.005578 |
| BEX4                 | 18.4075  | 8.80809  | -1.06339 | 0.00045  | 0.032102 |
| UGT1A1,UGT1A10,UGT:  | 23.8851  | 11.3537  | -1.07294 | 0.0005   | 0.034639 |
| CSTB                 | 216.243  | 102.757  | -1.07342 | 5.00E-05 | 0.005578 |
| CD55                 | 52.6521  | 24.872   | -1.08197 | 5.00E-05 | 0.005578 |
| ALOX15B              | 23.0346  | 10.8355  | -1.08803 | 5.00E-05 | 0.005578 |
| SPRR2D               | 54.9826  | 25.4084  | -1.11367 | 0.00045  | 0.032102 |
| WNT10A               | 10.7994  | 4.95827  | -1.12304 | 0.00035  | 0.026134 |
| ADM                  | 80.2394  | 36.8079  | -1.1243  | 0.0001   | 0.009692 |
| NOTCH3               | 31.5552  | 14.3052  | -1.14134 | 0.0001   | 0.009692 |
| KRT16                | 911.138  | 412.854  | -1.14204 | 0.0004   | 0.02941  |
| UNC5B                | 26.8896  | 12.1793  | -1.14261 | 5.00E-05 | 0.005578 |
| LINC00665            | 8.14538  | 3.64017  | -1.16198 | 0.00015  | 0.013326 |
| FOXA2                | 27.7073  | 12.2628  | -1.17598 | 0.0003   | 0.023121 |
| PVRL4                | 14.308   | 6.13963  | -1.2206  | 0.00015  | 0.013326 |
| PRKAA2               | 0.681742 | 0.288938 | -1.23847 | 0.00065  | 0.041717 |
| NUPR1                | 353.839  | 149.838  | -1.23969 | 5.00E-05 | 0.005578 |
| ZSCAN18              | 18.9868  | 7.98273  | -1.25004 | 0.00015  | 0.013326 |
| GDF15                | 178.421  | 74.8479  | -1.25326 | 0.00075  | 0.046578 |
| GRHL1                | 19.0809  | 7.98327  | -1.25708 | 5.00E-05 | 0.005578 |
| RHOV                 | 5.75413  | 2.37762  | -1.27508 | 0.0003   | 0.023121 |
| RGMA                 | 2.51696  | 1.03804  | -1.27782 | 0.00015  | 0.013326 |
| ABCA12               | 4.98778  | 2.0534   | -1.28038 | 5.00E-05 | 0.005578 |
| RABGGTA,TGM1         | 143.753  | 58.9765  | -1.28538 | 5.00E-05 | 0.005578 |
| SORT1                | 6.96631  | 2.82572  | -1.30178 | 5.00E-05 | 0.005578 |
| SPOCK3               | 1.03499  | 0.414922 | -1.31871 | 0.00025  | 0.020415 |
| CD74                 | 14.6632  | 5.71605  | -1.35911 | 0.0001   | 0.009692 |
| PPFIBP2              | 8.52832  | 3.31749  | -1.36217 | 0.0001   | 0.009692 |
| PRSS22               | 6.82504  | 2.56698  | -1.41076 | 0.00065  | 0.041717 |
| BAMBI                | 4.26998  | 1.60059  | -1.41563 | 0.00055  | 0.037295 |
| SPRR1B               | 966.01   | 353.649  | -1.44972 | 5.00E-05 | 0.005578 |
| NCOA1                | 2.60948  | 0.932432 | -1.48469 | 5.00E-05 | 0.005578 |
| HLA-G                | 5.74863  | 2.0067   | -1.51839 | 0.0002   | 0.016833 |
| NEO1                 | 10.2038  | 3.53911  | -1.52764 | 5.00E-05 | 0.005578 |
| TMPRSS4              | 18.299   | 6.32826  | -1.53188 | 5.00E-05 | 0.005578 |
| KRT10                | 26.0799  | 8.9421   | -1.54426 | 5.00E-05 | 0.005578 |
| ALDH3A1              | 131.81   | 43.592   | -1.59633 | 5.00E-05 | 0.005578 |
| PHACTR3              | 7.2167   | 2.30292  | -1.64788 | 0.00015  | 0.013326 |
| FAM181B              | 1.19229  | 0.380162 | -1.64905 | 0.0001   | 0.009692 |
| CCNA1                | 13.5713  | 4.3271   | -1.64908 | 5.00E-05 | 0.005578 |
| PPM1L                | 0.87467  | 0.276326 | -1.66237 | 0.0002   | 0.016833 |
| POLR2J2,POLR2J3,RASA | 196.58   | 61.9173  | -1.6667  | 5.00E-05 | 0.005578 |
| SLPI                 | 250.618  | 77.5568  | -1.69216 | 5.00E-05 | 0.005578 |
| RHCG                 | 50.4926  | 15.5733  | -1.697   | 5.00E-05 | 0.005578 |
| TRIM36               | 0.436496 | 0.134326 | -1.70023 | 0.0001   | 0.009692 |
| PRODH                | 25.4123  | 7.78279  | -1.70717 | 0.00065  | 0.041717 |
| NDN                  | 2.70738  | 0.823098 | -1.71776 | 5.00E-05 | 0.005578 |
| PGLYRP4              | 3.53728  | 1.06247  | -1.73523 | 0.00065  | 0.041717 |
| IVL                  | 26.3932  | 7.81802  | -1.75529 | 5.00E-05 | 0.005578 |
| NCCRP1               | 7.11095  | 2.05223  | -1.79285 | 0.0002   | 0.016833 |
| SERPINB4             | 5.9146   | 1.70576  | -1.79386 | 0.0006   | 0.039703 |
| HPGD                 | 0.845657 | 0.229612 | -1.88088 | 5.00E-05 | 0.005578 |
| GNPMB                | 30.2913  | 8.22135  | -1.88146 | 5.00E-05 | 0.005578 |
| MIR203               | 4.81747  | 1.29717  | -1.8929  | 0.0001   | 0.009692 |
| HOPX                 | 22.0542  | 5.9091   | -1.90005 | 5.00E-05 | 0.005578 |
| BSPRY                | 1.79081  | 0.46939  | -1.93175 | 0.0005   | 0.034639 |

|                       |          |            |          |          |          |
|-----------------------|----------|------------|----------|----------|----------|
| LIPH                  | 1.45708  | 0.376045   | -1.9541  | 0.0006   | 0.039703 |
| LY6D                  | 24.4812  | 6.1179     | -2.00056 | 5.00E-05 | 0.005578 |
| SPINK5                | 12.6363  | 3.14473    | -2.00657 | 5.00E-05 | 0.005578 |
| SERPINB3              | 42.2564  | 10.4076    | -2.02153 | 5.00E-05 | 0.005578 |
| GGT6                  | 3.38639  | 0.807739   | -2.06779 | 0.0001   | 0.009692 |
| TSPAN12               | 0.587772 | 0.138063   | -2.08993 | 5.00E-05 | 0.005578 |
| GUCY1B3               | 0.531211 | 0.124231   | -2.09626 | 5.00E-05 | 0.005578 |
| CDH26                 | 2.00954  | 0.464041   | -2.11454 | 5.00E-05 | 0.005578 |
| TMEM47                | 2.68374  | 0.607974   | -2.14217 | 5.00E-05 | 0.005578 |
| LGALS7B               | 258.151  | 58.1955    | -2.14924 | 5.00E-05 | 0.005578 |
| RRAD                  | 22.6372  | 5.05516    | -2.16287 | 5.00E-05 | 0.005578 |
| SPON2                 | 5.75357  | 1.27915    | -2.16928 | 5.00E-05 | 0.005578 |
| DNASE1L3              | 0.547773 | 0.121725   | -2.16995 | 0.0002   | 0.016833 |
| PHYHIP                | 1.95994  | 0.430144   | -2.18792 | 5.00E-05 | 0.005578 |
| SULT2B1               | 20.7257  | 4.54144    | -2.1902  | 5.00E-05 | 0.005578 |
| FOXP2                 | 2.08685  | 0.440047   | -2.2456  | 0.0001   | 0.009692 |
| KRT4                  | 28.7858  | 6.04515    | -2.25151 | 5.00E-05 | 0.005578 |
| KRT23                 | 14.5004  | 3.00174    | -2.27222 | 5.00E-05 | 0.005578 |
| SEPP1                 | 4.81338  | 0.989215   | -2.28269 | 0.0007   | 0.044043 |
| SNHG1                 | 276.415  | 56.4915    | -2.29073 | 5.00E-05 | 0.005578 |
| ATP10B                | 1.08541  | 0.220773   | -2.29761 | 5.00E-05 | 0.005578 |
| ABLM2                 | 0.697112 | 0.138775   | -2.32864 | 0.0001   | 0.009692 |
| CYP2J2                | 0.54017  | 0.107096   | -2.33451 | 5.00E-05 | 0.005578 |
| ULBP1                 | 5.76158  | 1.13544    | -2.34321 | 5.00E-05 | 0.005578 |
| NR3C2                 | 0.280957 | 0.0550818  | -2.3507  | 5.00E-05 | 0.005578 |
| EPHB6                 | 0.772945 | 0.150294   | -2.36258 | 0.0003   | 0.023121 |
| SLC40A1               | 0.581979 | 0.112989   | -2.36479 | 5.00E-05 | 0.005578 |
| IL34                  | 0.427902 | 0.0820703  | -2.38235 | 0.00015  | 0.013326 |
| GJA3                  | 0.366521 | 0.0673024  | -2.44517 | 0.0001   | 0.009692 |
| C3orf30,RP11-484M3.5, | 25.174   | 4.62035    | -2.44586 | 5.00E-05 | 0.005578 |
| EPB41L3               | 0.752289 | 0.131323   | -2.51817 | 5.00E-05 | 0.005578 |
| PPARGC1A              | 0.522896 | 0.0880876  | -2.56951 | 5.00E-05 | 0.005578 |
| ALDH3B2               | 12.0942  | 1.88337    | -2.68292 | 5.00E-05 | 0.005578 |
| CTD-2015G9.2          | 0.447021 | 0.0610608  | -2.87202 | 5.00E-05 | 0.005578 |
| CEA,CEACAM5,CEACAM    | 5.5307   | 0.743117   | -2.8958  | 5.00E-05 | 0.005578 |
| CACNA2D1              | 0.591385 | 0.0755967  | -2.9677  | 0.00025  | 0.020415 |
| MYH14                 | 2.07695  | 0.26457    | -2.97274 | 0.00055  | 0.037295 |
| PARK2                 | 0.55436  | 0.0703572  | -2.97805 | 0.0005   | 0.034639 |
| PI3                   | 55.1248  | 6.45894    | -3.09333 | 5.00E-05 | 0.005578 |
| EPHX3                 | 1.71145  | 0.194597   | -3.13666 | 5.00E-05 | 0.005578 |
| SPRR1A                | 448.865  | 50.6637    | -3.14726 | 5.00E-05 | 0.005578 |
| SGPP2                 | 6.68724  | 0.742211   | -3.17151 | 5.00E-05 | 0.005578 |
| ADH7                  | 4.68089  | 0.443451   | -3.39994 | 5.00E-05 | 0.005578 |
| ASPG                  | 0.884397 | 0.0792927  | -3.47943 | 0.00055  | 0.037295 |
| PIP5K1B               | 0.574197 | 0.0480304  | -3.57953 | 5.00E-05 | 0.005578 |
| KRT13                 | 57.8395  | 4.80154    | -3.59049 | 5.00E-05 | 0.005578 |
| SBSN                  | 27.5502  | 2.0531     | -3.74618 | 5.00E-05 | 0.005578 |
| CALB1                 | 0.989574 | 0.0711629  | -3.79761 | 5.00E-05 | 0.005578 |
| SPRR3                 | 111.299  | 7.79874    | -3.83505 | 5.00E-05 | 0.005578 |
| TMPRSS11B,TMPRSS11f   | 0.607314 | 0.0403553  | -3.91161 | 0.00065  | 0.041717 |
| DSG1                  | 0.733636 | 0.0327509  | -4.48546 | 0.00035  | 0.026134 |
| TGM3                  | 1.35551  | 0.0523183  | -4.69538 | 0.00015  | 0.013326 |
| MUC15                 | 3.05094  | 0.105599   | -4.85259 | 5.00E-05 | 0.005578 |
| PROSP                 | 4.78603  | 0.149477   | -5.00084 | 5.00E-05 | 0.005578 |
| ATP12A                | 4.69971  | 0.108813   | -5.43265 | 5.00E-05 | 0.005578 |
| SPINK7                | 2.06505  | 0.0470659  | -5.45535 | 5.00E-05 | 0.005578 |
| SNTB1                 | 0.275652 | 0.00530515 | -5.69931 | 0.00015  | 0.013326 |
| HEATR6                | 523.533  | 7.52907    | -6.11966 | 5.00E-05 | 0.005578 |
