# Supplementary material
Source: HighWire-hosted journal article supplement (https://openres.ersjournals.com/content/7/1/00254-2020)
Supplement: inline-supplementary-material-7 [file inline-supplementary-material-7.pdf]

| Genes differentially expressed in IB-HBEC versus NHBEC |                 |                      |             |          |          | Expression of genes induced by IB-HBEC after cumate removal |                      |                   |          |          |
|--------------------------------------------------------|-----------------|----------------------|-------------|----------|----------|-------------------------------------------------------------|----------------------|-------------------|----------|----------|
| gene                                                   | value_1 (NHBEC) | value_2 (P5 IB-HBEC) | log2(fold_c | p_value  | q_value  | value_1 (NHBEC)                                             | value_2 (P6 IB-HBEC) | log2(fold_change) | p_value  | q_value  |
| NES                                                    | 0.0192933       | 7.7599               | 8.65179     | 5.00E-05 | 0.010503 | 0.0193062                                                   | 5.90605              | 8.25699           | 0.1106   | 0.984969 |
| S100A7                                                 | 6.31587         | 1458.18              | 7.85097     | 5.00E-05 | 0.010503 | 6.32198                                                     | 197.599              | 4.96605           | 5.00E-05 | 0.012659 |
| TSPAN18                                                | 0.0370288       | 4.89613              | 7.04685     | 5.00E-05 | 0.010503 | 0.037036                                                    | 3.73352              | 6.65546           | 5.00E-05 | 0.012659 |
| NTRK1                                                  | 0.0108729       | 0.706975             | 6.02285     | 5.00E-05 | 0.010503 | 0.0108621                                                   | 0.817105             | 6.23314           | 5.00E-05 | 0.012659 |
| CLCA4                                                  | 11.2783         | 0.307644             | -5.19615    | 5.00E-05 | 0.010503 | 11.2646                                                     | 1.17918              | -3.25594          | 0.02025  | 0.539998 |
| BMI1,COM                                               | 80.1728         | 2732.29              | 5.09086     | 5.00E-05 | 0.010503 | 80.2875                                                     | 1842.5               | 4.52035           | 5.00E-05 | 0.012659 |
| AC005702.                                              | 27.7979         | 0.826595             | -5.07165    | 5.00E-05 | 0.010503 | 27.874                                                      | 53.8415              | 0.949798          | 0.17305  | 0.999805 |
| KRT13                                                  | 84.3112         | 3.33608              | -4.6595     | 5.00E-05 | 0.010503 | 84.4288                                                     | 3.91586              | -4.43033          | 5.00E-05 | 0.012659 |
| KRT4                                                   | 75.6637         | 3.07021              | -4.6232     | 5.00E-05 | 0.010503 | 75.6669                                                     | 2.39203              | -4.98335          | 5.00E-05 | 0.012659 |
| MSMB                                                   | 8.74436         | 0.425313             | -4.36175    | 5.00E-05 | 0.010503 | 8.74162                                                     | 0.549156             | -3.99261          | 5.00E-05 | 0.012659 |
| ANPEP                                                  | 2.15162         | 43.0028              | 4.32093     | 5.00E-05 | 0.010503 | 2.15314                                                     | 42.9713              | 4.31886           | 5.00E-05 | 0.012659 |
| B4GALNT1                                               | 0.0874094       | 1.57088              | 4.16764     | 5.00E-05 | 0.010503 | 0.0874692                                                   | 2.13916              | 4.61213           | 5.00E-05 | 0.012659 |
| COL8A2                                                 | 0.691128        | 11.6785              | 4.07875     | 5.00E-05 | 0.010503 | 0.691476                                                    | 9.8366               | 3.83041           | 5.00E-05 | 0.012659 |
| NDN                                                    | 4.438           | 0.277701             | -3.9983     | 5.00E-05 | 0.010503 | 4.45063                                                     | 0.735165             | -2.59787          | 0.00065  | 0.080339 |
| ATP12A                                                 | 21.6595         | 1.3766               | -3.97582    | 5.00E-05 | 0.010503 | 21.645                                                      | 0.358351             | -5.91652          | 0.0011   | 0.105931 |
| CA14                                                   | 0.34723         | 5.12656              | 3.88403     | 5.00E-05 | 0.010503 | 0.348128                                                    | 0.679813             | 0.965519          | 0.2345   | 0.999805 |
| HEPHL1                                                 | 3.66907         | 52.0397              | 3.82613     | 5.00E-05 | 0.010503 | 3.67198                                                     | 27.2965              | 2.89409           | 5.00E-05 | 0.012659 |
| INA                                                    | 0.335724        | 4.49078              | 3.74162     | 5.00E-05 | 0.010503 | 0.336042                                                    | 1.92013              | 2.5145            | 0.04025  | 0.711656 |
| CYP1A1                                                 | 1.91604         | 24.6229              | 3.6838      | 5.00E-05 | 0.010503 | 1.92128                                                     | 4.34445              | 1.17711           | 0.0996   | 0.959743 |
| LAPTM5                                                 | 0.389588        | 4.8259               | 3.63078     | 5.00E-05 | 0.010503 | 0.390704                                                    | 3.9025               | 3.32025           | 0.00045  | 0.063068 |
| KIAA1462                                               | 0.0461709       | 0.564562             | 3.61208     | 5.00E-05 | 0.010503 | 0.0461883                                                   | 1.19921              | 4.69842           | 0.00825  | 0.339896 |
| RLTPR                                                  | 0.0737813       | 0.860168             | 3.54329     | 5.00E-05 | 0.010503 | 0.0739265                                                   | 0.758318             | 3.35864           | 5.00E-05 | 0.012659 |
| CRNN                                                   | 29.2379         | 2.61269              | -3.48423    | 5.00E-05 | 0.010503 | 29.2099                                                     | 1.2575               | -4.53782          | 0.00385  | 0.22466  |
| RASL10B                                                | 0.230923        | 2.4296               | 3.39524     | 5.00E-05 | 0.010503 | 0.231059                                                    | 2.49115              | 3.43048           | 0.08525  | 0.928995 |
| APBB1                                                  | 0.519621        | 5.4506               | 3.39088     | 5.00E-05 | 0.010503 | 0.521703                                                    | 6.11378              | 3.55076           | 5.00E-05 | 0.012659 |
| RPLP0P2                                                | 1.47243         | 14.1601              | 3.26557     | 5.00E-05 | 0.010503 | 1.47263                                                     | 6.26205              | 2.08824           | 0.0011   | 0.105931 |
| PI3                                                    | 148.743         | 1400.2               | 3.23475     | 5.00E-05 | 0.010503 | 148.711                                                     | 199.319              | 0.422564          | 0.36125  | 0.999805 |
| LPO                                                    | 0.0451533       | 0.417383             | 3.20847     | 5.00E-05 | 0.010503 | 0.0451556                                                   | 0.344028             | 2.92955           | 1        | 1        |
| CPNE7                                                  | 1.19506         | 10.9945              | 3.20163     | 5.00E-05 | 0.010503 | 1.19674                                                     | 10.9793              | 3.1976            | 5.00E-05 | 0.012659 |
| ALOX5AP                                                | 1.00962         | 8.90494              | 3.1408      | 5.00E-05 | 0.010503 | 1.0102                                                      | 11.8513              | 3.55233           | 0.0202   | 0.539998 |
| SPRR2A,SP                                              | 234.81          | 2035.99              | 3.11617     | 5.00E-05 | 0.010503 | 234.73                                                      | 389.756              | 0.731565          | 0.15055  | 0.999805 |
| SH2D2A                                                 | 3.07203         | 25.8117              | 3.07076     | 5.00E-05 | 0.010503 | 3.0766                                                      | 32.6821              | 3.40909           | 5.00E-05 | 0.012659 |
| ALDH3A1                                                | 81.8035         | 9.9525               | -3.03903    | 5.00E-05 | 0.010503 | 81.9681                                                     | 6.55422              | -3.64457          | 5.00E-05 | 0.012659 |
| METTL7A                                                | 1.07844         | 0.133338             | -3.01578    | 5.00E-05 | 0.010503 | 1.08382                                                     | 0.395951             | -1.45274          | 0.1294   | 0.999805 |
| MEG3                                                   | 14.1777         | 108.718              | 2.9389      | 5.00E-05 | 0.010503 | 14.1832                                                     | 67.8196              | 2.25752           | 5.00E-05 | 0.012659 |
| SLC43A1                                                | 0.789979        | 6.03966              | 2.93458     | 5.00E-05 | 0.010503 | 0.791275                                                    | 4.2085               | 2.41106           | 0.0002   | 0.036934 |
| BMF                                                    | 0.193871        | 1.4716               | 2.92421     | 5.00E-05 | 0.010503 | 0.194108                                                    | 0.907047             | 2.22432           | 0.00065  | 0.080339 |
| PGBD5                                                  | 1.10297         | 8.27903              | 2.90807     | 5.00E-05 | 0.010503 | 1.10711                                                     | 13.4654              | 3.60439           | 5.00E-05 | 0.012659 |
| PADI1                                                  | 12.6858         | 1.73549              | -2.8698     | 5.00E-05 | 0.010503 | 12.6715                                                     | 2.13545              | -2.56898          | 0.0004   | 0.05868  |
| NID1                                                   | 0.662434        | 4.62627              | 2.804       | 5.00E-05 | 0.010503 | 0.662958                                                    | 6.09275              | 3.2001            | 0.001    | 0.101271 |
| FAM155B                                                | 0.978           | 6.02616              | 2.62333     | 5.00E-05 | 0.010503 | 0.976689                                                    | 1.84611              | 0.918519          | 0.18425  | 0.999805 |

|           |          |           |          |          |          |          |          |           |          |          |
|-----------|----------|-----------|----------|----------|----------|----------|----------|-----------|----------|----------|
| SORL1     | 4.51348  | 27.2468   | 2.59377  | 5.00E-05 | 0.010503 | 4.52361  | 30.8992  | 2.77202   | 5.00E-05 | 0.012659 |
| MPP2      | 0.142374 | 0.828236  | 2.54036  | 5.00E-05 | 0.010503 | 0.142705 | 0.916742 | 2.68348   | 5.00E-05 | 0.012659 |
| S100A12   | 7.71282  | 43.33     | 2.49004  | 5.00E-05 | 0.010503 | 7.72159  | 20.9487  | 1.43989   | 0.05755  | 0.820911 |
| PDE2A     | 1.14268  | 6.21391   | 2.44307  | 5.00E-05 | 0.010503 | 1.14355  | 6.75874  | 2.56323   | 5.00E-05 | 0.012659 |
| PDZK1IP1  | 10.3089  | 55.9708   | 2.44078  | 5.00E-05 | 0.010503 | 10.3171  | 35.6055  | 1.78706   | 0.0021   | 0.149835 |
| EFNB3     | 0.49411  | 2.66525   | 2.43137  | 5.00E-05 | 0.010503 | 0.495103 | 3.16893  | 2.67819   | 0.0012   | 0.111458 |
| CHRNB4    | 0.151409 | 0.786622  | 2.37722  | 5.00E-05 | 0.010503 | 0.151799 | 0.755881 | 2.316     | 0.001    | 0.101271 |
| FAM13C    | 0.406362 | 0.0786104 | -2.36998 | 5.00E-05 | 0.010503 | 0.406884 | 0.184998 | -1.13711  | 1        | 1        |
| IL27RA    | 1.14666  | 5.80421   | 2.33967  | 5.00E-05 | 0.010503 | 1.14891  | 4.87313  | 2.08458   | 0.01115  | 0.397752 |
| COL9A2    | 0.171426 | 0.841951  | 2.29615  | 5.00E-05 | 0.010503 | 0.171726 | 0.705729 | 2.03901   | 0.0001   | 0.022424 |
| NTM       | 8.25387  | 40.048    | 2.27859  | 5.00E-05 | 0.010503 | 8.2695   | 36.5386  | 2.14355   | 5.00E-05 | 0.012659 |
| CDH11     | 9.0652   | 41.6315   | 2.19927  | 5.00E-05 | 0.010503 | 9.08508  | 33.4411  | 1.88005   | 5.00E-05 | 0.012659 |
| SYT7      | 4.91909  | 22.0193   | 2.16231  | 5.00E-05 | 0.010503 | 4.92333  | 13.9703  | 1.50465   | 0.00145  | 0.123031 |
| AKR1C2    | 447.488  | 100.22    | -2.15868 | 5.00E-05 | 0.010503 | 447.575  | 61.4628  | -2.86434  | 5.00E-05 | 0.012659 |
| RAP1GAP   | 1.33771  | 5.91377   | 2.14431  | 5.00E-05 | 0.010503 | 1.33831  | 5.77116  | 2.10845   | 0.0001   | 0.022424 |
| GDPD5     | 0.570425 | 2.5173    | 2.14177  | 5.00E-05 | 0.010503 | 0.571706 | 4.55666  | 2.99463   | 5.00E-05 | 0.012659 |
| FAM43A    | 0.599617 | 2.62068   | 2.12783  | 5.00E-05 | 0.010503 | 0.599469 | 1.77875  | 1.56911   | 0.0357   | 0.680903 |
| TP53I11   | 4.98548  | 21.3068   | 2.09551  | 5.00E-05 | 0.010503 | 4.99174  | 21.0821  | 2.07841   | 5.00E-05 | 0.012659 |
| KIF21B    | 0.746251 | 3.08667   | 2.04832  | 5.00E-05 | 0.010503 | 0.74721  | 2.35991  | 1.65915   | 0.0042   | 0.235455 |
| GPRC5A    | 97.3854  | 24.3782   | -1.99811 | 5.00E-05 | 0.010503 | 97.4439  | 39.8315  | -1.29066  | 0.0142   | 0.450298 |
| CTB-50L17 | 0.69658  | 2.77131   | 1.99221  | 5.00E-05 | 0.010503 | 0.697036 | 1.58384  | 1.18412   | 0.044    | 0.738732 |
| S100A8    | 1569.15  | 6188.31   | 1.97956  | 5.00E-05 | 0.010503 | 1571.51  | 4179.36  | 1.41113   | 0.00025  | 0.041747 |
| ECM1      | 101.041  | 27.1162   | -1.89771 | 5.00E-05 | 0.010503 | 101.019  | 27.42    | -1.88133  | 0.00015  | 0.030187 |
| PTPRS     | 1.23661  | 4.45004   | 1.84743  | 5.00E-05 | 0.010503 | 1.23782  | 5.17579  | 2.06397   | 5.00E-05 | 0.012659 |
| RAB11FIP4 | 15.2089  | 4.51578   | -1.75187 | 5.00E-05 | 0.010503 | 15.3105  | 4.83632  | -1.66254  | 0.00105  | 0.103659 |
| ROBO3     | 10.9677  | 36.6311   | 1.7398   | 5.00E-05 | 0.010503 | 10.9821  | 26.4766  | 1.26957   | 0.00085  | 0.090765 |
| ALDH1L2   | 10.3829  | 34.4268   | 1.72932  | 5.00E-05 | 0.010503 | 10.3875  | 24.531   | 1.23976   | 0.00455  | 0.242106 |
| DDC8,TIMF | 10.483   | 34.4969   | 1.71841  | 5.00E-05 | 0.010503 | 10.4824  | 44.7312  | 2.09331   | 5.00E-05 | 0.012659 |
| CTSH      | 174.42   | 53.5968   | -1.70235 | 5.00E-05 | 0.010503 | 174.463  | 50.0279  | -1.80211  | 0.0001   | 0.022424 |
| EMP1      | 54.4101  | 17.586    | -1.62944 | 5.00E-05 | 0.010503 | 54.4413  | 28.0058  | -0.958974 | 0.0186   | 0.517667 |
| S100A9    | 2020.03  | 6211.02   | 1.62045  | 5.00E-05 | 0.010503 | 2022.37  | 4321.35  | 1.09544   | 0.00625  | 0.288548 |
| TXNIP     | 152.043  | 447.432   | 1.55719  | 5.00E-05 | 0.010503 | 152.355  | 454.147  | 1.57572   | 0.0001   | 0.022424 |
| KRT15,KRT | 1491.58  | 559.633   | -1.41428 | 5.00E-05 | 0.010503 | 1494.85  | 895.816  | -0.738725 | 0.042    | 0.722888 |
| KRT24     | 4.03622  | 0.357458  | -3.49716 | 0.0001   | 0.01974  | 4.0473   | 0.117307 | -5.1086   | 0.13805  | 0.999805 |
| OLFM2     | 1.5095   | 11.9014   | 2.97899  | 0.0001   | 0.01974  | 1.51121  | 19.7893  | 3.71095   | 5.00E-05 | 0.012659 |
| ARRB1     | 0.315863 | 1.52782   | 2.2741   | 0.0001   | 0.01974  | 0.316056 | 1.71665  | 2.44135   | 0.00045  | 0.063068 |
| COL4A2    | 17.4517  | 57.5416   | 1.72123  | 0.0001   | 0.01974  | 17.4879  | 68.1267  | 1.96186   | 5.00E-05 | 0.012659 |
| HSPA8     | 1581.43  | 628.495   | -1.33125 | 0.0001   | 0.01974  | 1581.5   | 589.494  | -1.42374  | 0.00015  | 0.030187 |
| C14orf132 | 0.178953 | 0.942726  | 2.39726  | 0.00015  | 0.027007 | 0.179301 | 1.38352  | 2.94789   | 5.00E-05 | 0.012659 |
| FBLN5     | 0.417206 | 2.02081   | 2.2761   | 0.00015  | 0.027007 | 0.417977 | 2.35445  | 2.49389   | 0.00025  | 0.041747 |
| PGLYRP3,P | 5.4303   | 26.2638   | 2.27397  | 0.00015  | 0.027007 | 5.44293  | 15.3355  | 1.49442   | 0.01025  | 0.383126 |
| CERS4     | 2.21418  | 9.94999   | 2.16793  | 0.00015  | 0.027007 | 2.21566  | 10.1469  | 2.19524   | 5.00E-05 | 0.012659 |
| E2F7      | 4.20789  | 16.8982   | 2.0057   | 0.00015  | 0.027007 | 4.21243  | 11.3292  | 1.42732   | 0.00405  | 0.231174 |

|           |          |          |          |         |          |          |          |           |          |          |
|-----------|----------|----------|----------|---------|----------|----------|----------|-----------|----------|----------|
| PALMD     | 9.78952  | 2.52921  | -1.95255 | 0.00015 | 0.027007 | 9.80342  | 8.537    | -0.199556 | 0.6903   | 0.999805 |
| SAA1      | 131.163  | 501.915  | 1.93608  | 0.00015 | 0.027007 | 131.363  | 800.994  | 2.60823   | 5.00E-05 | 0.012659 |
| SERPINB13 | 17.1639  | 5.28568  | -1.69922 | 0.00015 | 0.027007 | 17.1794  | 4.95905  | -1.79255  | 0.00045  | 0.063068 |
| IL23R     | 1.94779  | 0.224844 | -3.11484 | 0.0002  | 0.033099 | 1.94663  | 2.25439  | 0.211762  | 0.8013   | 0.999805 |
| SERPINB4  | 4.76397  | 30.8572  | 2.69537  | 0.0002  | 0.033099 | 4.7681   | 5.14931  | 0.110962  | 0.88815  | 0.999805 |
| KIAA1614  | 0.149625 | 0.938416 | 2.64888  | 0.0002  | 0.033099 | 0.149836 | 1.29279  | 3.10904   | 5.00E-05 | 0.012659 |
| SPRR3     | 862.604  | 185.572  | -2.21672 | 0.0002  | 0.033099 | 861.532  | 39.4639  | -4.4483   | 5.00E-05 | 0.012659 |
| BCAT1     | 4.74743  | 21.9384  | 2.20824  | 0.0002  | 0.033099 | 4.7493   | 21.0875  | 2.1506    | 0.00015  | 0.030187 |
| CRYAB     | 56.9224  | 14.9834  | -1.92563 | 0.0002  | 0.033099 | 56.9912  | 25.8699  | -1.13947  | 0.02195  | 0.557523 |
| PAQR7     | 40.4299  | 15.0832  | -1.42248 | 0.0002  | 0.033099 | 40.5612  | 23.3594  | -0.796097 | 0.05995  | 0.82761  |
| SLC2A1    | 402.925  | 194.218  | -1.05284 | 0.0002  | 0.033099 | 403.512  | 367.298  | -0.135663 | 0.6777   | 0.999805 |
| RBP7      | 1.42267  | 13.3082  | 3.22565  | 0.00025 | 0.040157 | 1.42385  | 7.9711   | 2.48498   | 0.00525  | 0.261617 |
| TLE2      | 1.4456   | 5.70682  | 1.98102  | 0.00025 | 0.040157 | 1.44656  | 5.84851  | 2.01544   | 0.0002   | 0.036934 |
| SCNN1A    | 72.2851  | 19.343   | -1.90189 | 0.00025 | 0.040157 | 72.3895  | 43.7603  | -0.726155 | 0.2571   | 0.999805 |
| KIRREL2   | 0        | 0.438836 | inf      | 0.0003  | 0.045511 | 0        | 0.449381 | inf       | 0.00195  | 0.144383 |
| NPTXR     | 0.245905 | 2.15664  | 3.13261  | 0.0003  | 0.045511 | 0.245691 | 2.07169  | 3.07589   | 5.00E-05 | 0.012659 |
| GLT8D2    | 1.14603  | 10.0138  | 3.12727  | 0.0003  | 0.045511 | 1.14791  | 7.92274  | 2.78699   | 0.00175  | 0.138736 |
| DKK1      | 75.282   | 15.2463  | -2.30384 | 0.0003  | 0.045511 | 75.3363  | 5.6474   | -3.73769  | 0.00025  | 0.041747 |
| RIMS3     | 0.340996 | 1.55013  | 2.18456  | 0.0003  | 0.045511 | 0.341701 | 2.02097  | 2.56424   | 0.00025  | 0.041747 |
| TNFRSF19  | 0.980566 | 3.27668  | 1.74055  | 0.0003  | 0.045511 | 0.981253 | 0.810618 | -0.275602 | 0.6714   | 0.999805 |
